# Supplementary material
Source: PubMed Central journal article supplement (PMC6904894)
Supplement: NIHMS1543846-supplement-1.pdf [file NIHMS1543846-supplement-1.pdf]

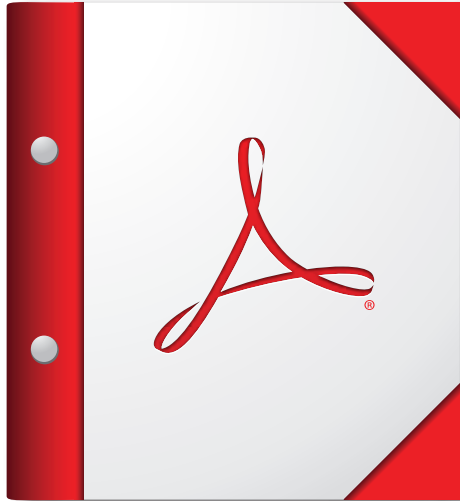

**For the best experience, open this PDF portfolio in  
Acrobat X or Adobe Reader X, or later.**

[Get Adobe Reader Now!](#)
